# Supplementary material for: Recent BMI acceleration identifies limits of metabolic plasticity and ectopic fat deposition
Source: Research Square preprint supplement (doi:10.21203/rs.3.rs-8866544/v1), 2026-02-16
Supplement: Supplementary file 1 [file 5112ed205475cb73cd73a9c1.xlsx]

## Sheet: Index
Supplementary Tables
ST1	Age, sex and BMI distributions in individuals with and without BMI trajectory data in the UK Biobank
ST2	Follow-up time and measurements distributions in the UK Biobank
ST3	Likelihood ratio test p-value and fraction of added information (FAI) attributed to slope information in blood biomarkers
ST4	Likelihood ratio test p-value and fraction of added information (FAI) attributed to slope x BMI interaction in blood biomarkers
ST5	Likelihood ratio test p-value and fraction of added information (FAI) attributed to slope information in imaging biomarkers
ST6	Likelihood ratio test p-value and fraction of added information (FAI) attributed to slope x BMI interaction in imaging biomarkers
ST7	Age, sex and BMI distributions in UKB, RS and ALSPAC
ST8	Tukeys five numbers describing the distribution of slopes in UKB, RS and ALSPAC
ST9	Inclusion criteria for each biomarker analysed in the UK Biobank

## Sheet: ST1
Sex	Included	Ntotal	Variable	Median	Q25	Q75
Female	FALSE	186140	Age	57	50	63
Female	TRUE	66701	Age	58	51	63
Male	FALSE	167173	Age	58	50	63
Male	TRUE	57135	Age	60	52	64
Female	FALSE	186140	BMI	26.1195	23.6115	29.5847
Female	TRUE	66701	BMI	26.928	24.2188	30.7125
Male	FALSE	167173	BMI	27.1953	24.9372	29.8659
Male	TRUE	57135	BMI	27.8393	25.463	30.7266

## Sheet: ST2
Sex	Variable	Median	Q25	Q75
Female	Number of measures	3.00	2.00	4.00
Male	Number of measures	3.00	2.00	5.00
Female	Follow-up time	-3.36	-4.28	-2.09
Male	Follow-up time	-3.28	-4.26	-2.01

## Sheet: ST3
Sex	Trait	LRT_Pvalue	FDR	FAI
Female	ALT	8.44057e-117	TRUE	7.74
Female	AST	1.3924e-63	TRUE	8.2
Female	GGT	2.91695e-27	TRUE	3.17
Female	CRP	5.99955e-41	TRUE	1.34
Female	SBP	4.87865e-46	TRUE	1.71
Female	DBP	1.34934e-61	TRUE	4.13
Female	HDL	2.81469e-17	TRUE	0.85
Female	LDL	5.92842e-42	TRUE	1.25
Female	TG	6.58467e-51	TRUE	2.89
Female	GLU	6.84017e-19	TRUE	0.68
Female	SCR	0.00172521	TRUE	1.8
Female	WHR	7.34655e-17	TRUE	0.52
Male	ALT	1.36327e-216	TRUE	11.7
Male	AST	7.53547e-86	TRUE	18.78
Male	GGT	2.12952e-62	TRUE	7.06
Male	SBP	3.62679e-63	TRUE	5.45
Male	DBP	2.37617e-78	TRUE	7.23
Male	HDL	9.95264e-05	TRUE	0.54
Male	LDL	2.61258e-74	TRUE	1.64
Male	TG	1.2203e-111	TRUE	9.9
Male	GLU	5.54932e-14	TRUE	0.47
Male	SCR	1.44239e-05	TRUE	2.03
Male	WHR	3.43804e-43	TRUE	0.6
Male	CRP	1.72433e-31	TRUE	2.59

## Sheet: ST4
Sex	Trait	LRT_Pvalue	FDR	FAI
Female	ALT	8.02976e-25	TRUE	1.77
Female	AST	5.45245e-09	TRUE	1.34
Female	GGT	1.30631e-05	TRUE	0.76
Female	CRP	6.04134e-13	TRUE	0.45
Female	SBP	1.18239e-05	TRUE	0.19
Female	DBP	2.30734e-09	TRUE	0.76
Female	HDL	0.000308609	TRUE	0.19
Female	LDL	0.0521478	FALSE	0.08
Female	TG	1.98542e-05	TRUE	0.4
Female	GLU	2.56173e-07	TRUE	0.24
Female	SCR	0.197248	FALSE	0.65
Female	WHR	4.91886e-05	TRUE	0.16
Male	ALT	3.23728e-16	TRUE	1.06
Male	AST	1.04751e-05	TRUE	1.57
Male	GGT	2.90408e-06	TRUE	0.95
Male	SBP	0.0118444	TRUE	0.31
Male	DBP	0.0135398	TRUE	0.43
Male	HDL	0.140542	FALSE	0.18
Male	LDL	0.121347	FALSE	0.07
Male	TG	0.00293431	TRUE	0.51
Male	GLU	0.0524305	FALSE	0.08
Male	SCR	0.696373	FALSE	0.26
Male	WHR	0.00269282	TRUE	0.06
Male	CRP	3.39109e-06	TRUE	0.62

## Sheet: ST5
Sex	Trait	LRT_Pvalue	FDR	FAI
Female	BF%	4.15439e-17	TRUE	0.77
Female	ArmsF%	0.0271985	TRUE	0.28
Female	LegsF%	8.31206e-12	TRUE	1.94
Female	TrunkF%	9.66286e-13	TRUE	0.54
Female	AndF%	8.3561e-11	TRUE	0.55
Female	GynF%	3.46647e-26	TRUE	2.18
Female	LiverF%	3.54959e-17	TRUE	5.65
Male	BF%	1.93544e-14	TRUE	1.01
Male	ArmsF%	8.05848e-06	TRUE	0.93
Male	LegsF%	2.20717e-10	TRUE	2.02
Male	TrunkF%	1.9528e-16	TRUE	0.99
Male	AndF%	2.5245e-18	TRUE	1.13
Male	GynF%	5.89463e-10	TRUE	1.14
Male	LiverF%	5.20127e-22	TRUE	7.17

## Sheet: ST6
Sex	Trait	LRT_Pvalue	FDR	FAI
Female	BF%	0.460045	FALSE	0.05
Female	ArmsF%	0.411204	FALSE	0.08
Female	LegsF%	0.643546	FALSE	0.07
Female	TrunkF%	0.310206	FALSE	0.05
Female	AndF%	0.30246	FALSE	0.06
Female	GynF%	0.547734	FALSE	0.07
Female	LiverF%	9.66215e-05	TRUE	1.75
Male	BF%	0.250491	FALSE	0.1
Male	ArmsF%	0.290793	FALSE	0.1
Male	LegsF%	0.478834	FALSE	0.11
Male	TrunkF%	0.190895	FALSE	0.11
Male	AndF%	0.327967	FALSE	0.08
Male	GynF%	0.0331593	FALSE	0.21
Male	LiverF%	6.11664e-05	TRUE	1.87

## Sheet: ST7
cohort	sex	N	prop	age_q25	age_q50	age_q75	bmi_q25	bmi_q50	bmi_q75
ALSPAC	Female	2846	0.563453	17.5833	17.75	17.9167	20.1401	22.0931	24.8053
ALSPAC	Male	2205	0.436547	17.5833	17.75	17.9167	20.0544	21.7646	24.3398
RS	Female	4609	0.569927	63.5965	68.1086	73.8117	24.1672	26.8352	29.9914
RS	Male	3478	0.430073	63.652	67.9457	73.1984	24.642	26.6292	28.994
UKB	Female	66701	0.538624	51	58	63	24.2188	26.928	30.7125
UKB	Male	57135	0.461376	52	60	64	25.463	27.8393	30.7266

## Sheet: ST8
cohort	sex	qmin	q25	q50	q75	qmax
ALSPAC	Male	0.04	0.47	0.64	0.85	1.53
ALSPAC	Female	-0.09	0.36	0.54	0.74	1.44
RS	Male	-0.61	-0.15	0.00	0.16	0.59
RS	Female	-0.71	-0.15	0.05	0.25	0.81
UKB	Female	-0.84	0.02	0.25	0.48	1.20
UKB	Male	-0.60	-0.02	0.17	0.37	0.97

## Sheet: ST9
Biomarker	Lower bound	Upper bound	N included
ALT	5	70	114980
AST	15	60	113613
CRP		10	111133
DBP	50	120	123629
GGT	10	120	111882
GLU	3	15	105973
HDL	0.5	3	106452
LDL	1	7	116432
SBP	80	220	123674
SCR	40	150	116195
TG	0.5	7	115690
WHR	0.6	1.4	123796
